# Supplementary material for: Deteriorated sleep quality and associate factors in patients with type 2 diabetes mellitus complicated with diabetic peripheral neuropathy
Source: PeerJ. 2024 Jan 22;12:e16789. doi: 10.7717/peerj.16789 (PMC10809979; doi:10.7717/peerj.16789)
Supplement: Supplemental Information 2 [file peerj-12-16789-s002.xlsx]

## Sheet: data
bed number	NO.	sex	age	height	weight	bmi	permanent address	marital status	occupation	degree of education	income	smoking	smoking new group	drinking	drinking new group	life pressure	meals	exercise	physical exam	duration of illness	hypertension	physical pain	operation	diet	medicine take	economical burden	psychological burden	fpg	2hpg	hba1c	ctai	psqi	psqigroup	hba1c group	fpggroup	2hpggroup	bmigroup	subjectivesleepquality	sleeplatency	sleeptime	sleepefficiency	sleepdisorders	hypnoticdrugs	daytimedysfunction
56	1	1	60	160	59.9	23.4	1	1	5	3	3	2	1	1	2	3	2	4	4	2	2	1	1	2	1	2	3	9.42	17.24	10.3	850	6	0	2	2	2	1	0	1	1	2	1	0	1
4	2	2	70	165	60	22	1	1	5	2	4	2	1	2	1	1	3	4	2	3	2	2	2	3	1	1	4	11.83	13.34	9.5	1332	12	1	2	2	2	1	2	3	2	2	1	0	2
26	3	1	51	170	63	21.8	1	1	4	2	3	1	2	1	2	4	4	4	4	1	1	1	1	2	2	1	4	13.45	8.88	11.7	453.1	12	1	2	2	1	1	3	1	2	2	1	0	3
22	4	1	58	162	70	26.7	1	1	3	4	4	3	1	2	1	2	2	3	4	3	2	2	1	1	1	1	2	6.04	9.8	8.5	1201	14	1	2	1	1	2	2	1	3	3	2	0	3
26	5	1	62	173	70	23.4	1	1	5	4	3	1	2	1	2	2	2	1	2	1	1	2	1	1	2	2	1	9.28	9.65	10.8	707.8	6	0	2	2	1	1	0	0	2	2	1	0	1
3	6	2	47	156	63	25.9	1	1	4	2	2	1	2	1	2	4	3	3	2	2	1	2	2	2	2	4	3	10.55	18.89	10.8	704.8	16	1	2	2	2	2	3	3	3	3	2	0	2
5	7	2	55	160	70	27.3	1	1	5	4	3	2	1	2	1	2	3	3	4	2	2	2	2	1	1	2	2	10.53	16.3	9.5	589.6	16	1	2	2	2	2	2	3	3	3	2	0	3
50	8	2	68	156	60	24.7	3	3	1	2	2	3	1	3	1	2	2	3	4	1	2	2	2	1	1	2	2	15.14	11.59	10.5	743.1	14	1	2	2	2	2	2	2	2	3	2	0	3
4	9	2	52	155	52.5	21.9	1	1	3	4	4	2	1	2	1	3	2	4	2	3	2	1	2	2	1	1	3	8.26	10.62	8.3	909.7	8	1	2	2	2	1	1	2	2	2	1	0	0
56	10	2	52	155	47	19.6	3	1	1	2	1	2	1	2	1	4	2	4	4	3	2	2	2	3	1	3	3	4.47	12.3	5.7	388.3	14	1	1	1	2	1	3	1	2	3	2	0	3
5	11	2	50	164	61	22.7	1	1	6	1	4	2	1	2	1	2	1	4	2	3	2	2	2	2	1	2	3	8.24	21.45	8.6	964.5	12	1	2	2	2	1	2	3	2	3	1	0	1
23	12	1	43	170	70	24.2	3	1	2	4	2	3	1	3	1	4	2	4	1	2	1	1	2	1	2	2	1	14.87	22.27	9	835.5	12	1	2	2	2	2	1	2	3	3	2	0	1
22	13	1	58	164	64	23.8	1	1	3	4	3	3	1	2	1	3	2	4	4	2	1	1	1	1	2	1	3	16.57	25.38	12.9	510.7	1	0	2	2	2	1	0	0	0	0	1	0	0
56	14	1	62	170	72	24.9	1	1	5	4	4	2	1	2	1	1	1	2	2	3	2	2	2	1	1	1	1	7.04	9.35	6.2	856.8	2	0	1	2	1	2	0	0	1	0	1	0	0
9	15	2	69	159	55	21.8	3	1	1	1	1	2	1	2	1	2	1	4	2	1	2	1	2	1	1	2	1	12.81	18.71	15.6	696.4	4	0	2	2	2	1	0	0	1	2	1	0	0
53	16	2	67	153	50	21.4	2	1	1	1	2	2	1	2	1	3	2	1	4	2	2	1	1	3	1	2	2	7.91	13.07	8.6	1704	5	0	2	2	2	1	1	1	0	0	2	0	1
23	17	1	48	171	72	24.6	1	1	6	3	2	2	1	2	1	2	1	1	2	3	1	2	1	1	2	1	1	14.41	16.96	10.4	608.5	3	0	2	2	2	2	0	1	1	0	1	0	0
51	18	1	66	170	65	22.5	1	1	1	3	2	2	1	1	2	2	2	3	1	3	2	2	2	2	1	2	2	9.21	12.29	11	117	10	1	2	2	2	1	2	2	2	1	2	0	1
15	19	2	57	157	55	22.3	1	1	1	2	2	2	1	2	1	2	1	4	4	1	1	1	2	1	1	1	2	12.89	11.24	13.3	24.2	9	1	2	2	2	1	1	1	3	3	1	0	0
8	20	2	76	157	71.6	29	2	1	1	1	3	2	1	2	1	4	3	4	4	3	2	2	2	1	1	3	3	10.94	24.67	11.3	1954	11	1	2	2	2	2	2	1	2	2	2	0	2
3	21	2	72	155	55	22.9	2	1	1	1	2	2	1	2	1	3	3	4	4	3	1	2	2	1	1	2	2	10.78	11.7	9.6	775.7	6	0	2	2	2	1	1	0	0	1	2	0	2
5	22	1	49	163	65	24.5	1	1	3	3	3	3	1	1	2	3	1	3	2	1	1	1	1	1	1	2	2	22.65	16.3	14.4	166.3	7	0	2	2	2	2	0	1	2	3	1	0	0
26	23	1	42	165	82.2	30.2	1	1	4	2	3	1	2	1	2	2	4	4	4	2	1	1	2	1	1	1	3	6.44	8.46	6.4	973.8	14	1	1	1	1	2	3	2	3	2	2	0	2
6	24	1	39	160	67	26.2	1	1	2	2	3	1	2	2	1	3	3	4	4	2	1	1	1	2	2	2	4	7.66	11.63	6.5	1288	10	1	1	2	2	2	2	2	2	1	1	0	2
52	25	2	70	153	67	28.6	1	1	1	1	3	2	1	2	1	2	2	2	2	1	2	1	1	1	2	2	4	6.85	7.24	14.5	263.5	4	0	2	1	1	2	0	0	1	1	2	0	0
57	26	1	86	171	67.8	23.2	1	3	5	2	3	1	2	1	2	1	1	3	2	2	1	2	1	3	1	1	2	8.99	8.41	13.1	403.6	16	1	2	2	1	1	3	3	3	3	1	0	3
27	27	1	59	165	66.5	24.43	3	1	3	2	3	1	2	3	1	2	1	1	4	3	2	2	2	1	1	1	1	8.93	17.49	8	1376	8	1	2	2	2	2	1	1	2	2	2	0	0
26	28	1	57	165	69	25.3	1	1	3	4	4	2	1	1	2	2	1	1	2	3	1	2	2	1	1	2	3	6.64	9.36	7.1	1084	8	1	2	1	1	2	1	1	2	3	1	0	0
25	29	1	58	165	67	24.6	2	1	3	2	2	1	2	1	2	3	2	4	4	3	2	2	2	1	1	1	4	6.57	6.19	7.4	1313	11	1	2	1	1	2	2	0	2	3	2	0	2
14	30	1	48	182	70	21.1	1	1	3	3	2	1	2	2	1	2	2	1	2	3	1	2	1	2	1	1	2	12.78	17.38	14.9	180.6	5	0	2	2	2	1	0	1	1	1	1	0	1
24	31	1	44	182	70	21.1	3	1	2	2	2	1	2	2	1	4	3	4	4	1	1	1	2	1	2	2	3	9.77	7.06	10.9	755.8	7	0	2	2	1	1	1	0	2	1	1	0	2
4	32	2	69	155	57	23.7	1	1	1	1	2	2	1	2	1	3	3	2	4	3	2	1	2	2	1	2	4	10.48	13.92	8.7	351.6	11	1	2	2	2	1	2	2	2	3	1	0	1
5	33	1	53	169	77	26.7	2	3	3	3	3	3	1	1	2	3	2	3	4	2	2	1	1	2	2	2	2	13.86	15.54	15.6	672.8	11	1	2	2	2	2	2	2	2	2	1	0	2
22	34	1	70	156	63	25.9	3	3	1	2	2	3	1	2	1	2	2	1	4	3	2	2	2	1	1	2	2	7.19	9.83	7.5	1657	6	0	2	2	1	2	1	1	1	1	2	0	0
8	35	2	53	155	66	27.5	3	1	4	2	3	1	2	2	1	4	3	4	4	1	1	1	2	1	2	2	4	13.92	18.2	13	670.5	13	1	2	2	2	2	3	2	3	2	1	0	2
52	36	2	71	149	55	24.8	2	1	1	1	2	2	1	2	1	3	1	4	1	3	2	2	2	1	1	2	2	6.2	10.24	6.5	410.8	6	0	1	1	2	2	1	1	0	1	2	0	1
7	37	2	70	155	69.5	28.9	2	1	1	1	2	2	1	2	1	1	2	1	2	3	2	2	2	1	1	2	3	9.45	9.62	7.4	1258	4	0	2	2	1	2	0	1	1	0	1	0	1
6	38	1	35	173	74	24.7	1	1	3	3	2	2	1	2	1	4	4	4	3	2	1	1	1	2	2	1	4	12.06	25.23	10.5	1668	3	0	2	2	2	2	0	0	1	0	1	0	1
10	39	2	56	160	82	32	1	1	3	2	2	2	1	2	1	3	3	1	2	1	1	1	2	2	2	1	4	9.32	11.37	8	1249	3	0	2	2	2	2	0	0	0	1	1	0	1
5	40	2	75	155	53	22	2	3	1	1	3	2	1	2	1	3	1	4	4	3	1	1	2	3	1	2	4	6.92	16.25	8.3	522.1	9	1	2	1	2	1	2	2	1	1	1	0	2
51	41	1	82	160	55	21.5	2	3	5	2	3	2	1	2	1	2	2	4	4	3	2	2	2	2	2	2	1	9.25	15.17	7	845.7	8	1	2	2	2	1	2	2	1	0	1	0	2
56	42	1	53	164	72	26.8	3	1	1	2	2	1	2	1	2	4	2	4	4	3	2	2	2	2	1	3	2	6.52	8.86	5.9	1590	10	1	1	1	1	2	2	1	2	2	1	0	2
23	43	1	60	180	61.8	19.1	1	1	5	3	3	3	1	1	2	1	1	1	2	3	1	1	1	1	1	1	2	12.08	9.96	12.3	535.5	3	0	2	2	1	1	0	1	1	0	1	0	0
50	44	1	62	168	62.5	22.1	2	1	1	2	2	2	1	2	1	3	2	4	4	2	2	1	2	1	1	3	3	7.97	12.09	8.1	1704	5	0	2	2	2	1	1	0	0	0	1	0	3
25	45	1	45	172	81	27.4	1	1	4	2	3	1	2	1	2	4	4	4	2	3	1	1	2	2	2	2	4	8.52	12.08	12	810.1	7	0	2	2	2	2	1	0	2	2	1	0	1
27	46	1	49	160	62	24.2	2	1	3	2	2	3	1	1	2	3	2	1	2	3	2	2	2	2	1	2	3	8.96	11.16	8.4	1049	14	1	2	2	2	2	3	3	3	3	1	0	1
57	47	1	51	178	76.7	24.2	1	1	3	4	3	1	2	1	2	2	2	1	2	3	1	2	2	1	2	1	1	6.42	5.64	6.4	450.4	1	0	1	1	1	2	0	0	0	0	1	0	0
13	48	1	53	165	63	23.1	3	1	3	4	3	1	2	1	2	4	2	4	3	3	2	2	2	2	1	1	4	8.36	9.9	6.9	981.5	20	1	1	2	1	1	3	3	3	3	2	3	3
22	49	1	63	173	63	21	1	1	5	3	3	1	2	3	1	1	2	1	1	3	2	2	2	1	1	1	2	6.01	10.51	9.5	1006	6	0	2	1	2	1	1	1	1	1	1	0	1
9	50	2	64	155	47.5	19.8	1	1	1	1	3	2	1	2	1	2	2	1	2	3	1	2	1	2	1	2	3	9.72	15.43	9.5	182.3	14	1	2	2	2	1	3	2	3	3	1	0	2
10	51	2	64	155	45	18.7	3	1	1	1	1	2	1	2	1	3	4	4	4	1	1	1	1	1	2	2	3	13.02	17.33	13.9	309.6	4	0	2	2	2	1	0	1	2	0	1	0	0
52	52	2	72	160	80	31.3	2	1	5	3	3	2	1	3	1	1	1	4	2	3	2	2	2	1	1	1	4	12.82	23.69	10.5	1719	7	0	2	2	2	2	0	1	2	2	1	0	1
7	53	2	42	165	64.5	23.7	3	1	2	2	2	2	1	2	1	4	4	4	4	1	1	1	2	2	2	2	4	15.52	22.41	8.1	920.7	8	1	2	2	2	1	1	2	2	2	1	0	0
27	54	2	52	165	70	25.7	1	1	6	2	2	2	1	2	1	3	1	2	2	3	1	1	2	1	1	2	2	15.06	15.57	9.8	1046	11	1	2	2	2	2	2	2	2	2	2	0	1
56	55	1	74	168	57.8	20.5	1	1	5	3	3	1	2	3	1	1	2	3	2	3	1	2	1	2	1	2	2	14.22	9.89	12.5	115.4	10	1	2	2	1	1	2	2	1	1	2	0	2
6	56	1	46	167	81	29	1	1	4	3	3	1	2	1	2	4	2	4	4	2	2	1	2	1	1	2	3	14.71	21.23	9.3	1184	11	1	2	2	2	2	2	1	2	1	2	0	3
10	57	2	64	150	56	24.9	3	1	1	1	2	2	1	2	1	2	4	4	4	1	1	2	2	3	2	3	4	13.96	8.52	11.7	76.1	14	1	2	2	1	2	3	1	2	3	2	0	3
3	58	1	51	160	66	25.8	1	1	6	3	2	3	1	2	1	2	1	1	2	2	2	2	2	1	2	1	2	8.75	14.21	6.1	1956	3	0	1	2	2	2	0	1	1	0	1	0	0
7	59	1	55	173	86	28.7	2	1	1	2	2	3	1	1	2	3	2	4	4	2	1	2	1	1	1	2	2	8.58	8.95	6.6	1359	4	0	1	2	1	2	1	0	1	0	1	0	1
26	60	2	59	155	67	27.9	3	1	1	1	2	2	1	2	1	2	2	4	4	3	1	2	2	2	1	3	2	15.61	9.73	12.4	412.7	13	1	2	2	1	2	2	3	3	3	1	0	1
57	61	2	50	154	59	24.9	3	1	4	2	3	2	1	2	1	1	1	2	2	2	2	1	2	1	1	1	1	7.78	5.57	7.2	1174	3	0	2	2	1	2	0	1	0	0	1	0	1
56	62	1	53	175	85.5	27.9	3	1	1	2	2	3	1	1	2	3	2	1	4	1	1	2	2	1	1	2	4	9.21	18.41	9.1	1020	4	0	2	2	2	2	1	0	1	0	1	0	1
8	63	1	57	170	78	27	1	1	3	4	3	1	2	1	2	2	2	2	2	2	2	1	2	1	2	1	1	14	16.85	10.7	296.3	9	1	2	2	2	2	1	1	2	3	1	0	1
14	64	1	46	171	67	22.9	1	1	1	2	2	1	2	2	1	4	2	4	4	3	1	1	1	1	2	3	3	15.26	10.53	14.6	124.2	16	1	2	2	2	1	3	3	3	3	1	0	3
52	65	1	60	165	65	23.9	2	1	1	2	2	1	2	2	1	2	2	4	4	3	1	2	1	1	1	2	2	7.42	8.94	10.1	411.2	9	1	2	2	1	1	1	1	2	3	1	0	1
57	66	1	59	168	76.6	27.1	1	1	3	3	3	1	2	1	2	3	2	3	2	3	2	1	1	2	1	1	2	17.54	8.14	17.7	367.8	8	1	2	2	1	2	1	3	1	1	1	0	1
24	67	1	56	167	71	25.5	1	1	1	2	2	1	2	3	1	3	2	4	4	3	1	2	2	2	2	3	3	11.45	13.27	9.5	491.2	11	1	2	2	2	2	0	3	2	3	2	0	1
56	68	1	65	168	64.6	22.9	2	1	5	4	3	1	2	1	2	1	1	1	2	3	1	1	2	1	1	1	2	5.82	6.74	5.8	893.5	4	0	1	1	1	1	0	1	0	1	1	0	1
22	69	1	52	165	59	21.7	1	1	2	2	2	1	2	2	1	3	2	2	3	3	1	2	2	2	1	2	3	4.72	6.08	6.8	651.3	12	1	1	1	1	1	2	2	2	2	2	0	2
4	70	1	63	170	77	26.6	2	1	5	3	4	3	1	3	1	1	1	3	2	3	2	2	2	2	1	1	4	8.24	16.47	10.4	1068	11	1	2	2	2	2	2	3	2	3	1	0	0
53	71	2	60	155	80	33.3	2	1	1	1	2	2	1	2	1	3	2	4	4	3	2	2	2	2	1	3	4	7.14	10.51	6.7	1083	9	1	1	2	2	2	1	1	2	3	1	0	1
10	72	1	62	170	69	23.9	1	1	5	4	3	3	1	1	2	2	1	1	2	3	2	1	2	2	1	1	2	6.25	9.39	7.2	692	6	0	2	1	1	1	0	1	1	3	1	0	0
57	73	1	69	167	59	21.2	1	1	2	2	2	3	1	3	1	3	2	3	3	3	1	2	2	2	1	3	1	6.12	6.13	6.5	814.6	15	1	1	1	1	1	3	3	3	3	1	0	2
24	74	1	38	165	70.9	26	3	1	2	2	2	1	2	1	2	4	3	1	4	1	2	2	1	1	1	3	4	17.01	29.04	11.7	948.9	5	0	2	2	2	2	0	0	2	2	1	0	0
9	75	2	74	160	57.5	22.5	1	1	5	3	3	1	2	1	2	1	2	4	3	2	2	2	2	2	2	2	1	9.68	16.84	11.8	1125	10	1	2	2	2	1	2	2	2	2	2	0	0
8	76	2	49	157	48.6	19.7	3	1	1	1	2	2	1	2	1	4	3	4	4	1	1	2	1	2	2	3	3	7.3	8.26	8.4	289	5	0	2	2	1	1	0	0	2	2	1	0	0
7	77	2	53	155	67.9	28.3	3	1	1	1	2	2	1	2	1	4	3	4	4	2	1	1	2	1	1	2	2	8.27	17.33	8.8	110.9	10	1	2	2	2	2	1	2	1	3	1	0	2
8	78	2	69	152	62.5	27.1	1	1	6	2	3	2	1	2	1	2	1	1	2	3	2	2	2	2	1	1	2	6.26	7.24	6.3	785.9	9	1	1	1	1	2	2	1	1	2	1	0	2
22	79	2	67	152	43	18.6	2	1	1	2	4	2	1	2	1	1	2	4	2	2	1	2	2	3	1	2	2	5.12	12.56	10	10.1	4	0	2	1	2	1	0	2	0	1	1	0	0
27	80	1	65	162	75	28.6	3	1	5	4	4	1	2	2	1	1	1	4	4	3	2	2	2	2	1	2	2	8.46	9.04	11.1	715.5	8	1	2	2	1	2	3	1	0	1	2	0	1
51	81	2	60	152	48	20.8	2	1	5	2	3	2	1	2	1	2	1	4	2	3	2	2	2	1	1	2	2	9.75	9.2	7.3	871.5	9	1	2	2	1	1	2	1	1	3	1	0	1
5	82	1	54	174	79.6	26.3	2	1	3	3	3	1	2	2	1	2	1	2	2	1	1	2	1	2	1	2	3	11.81	22.3	11.8	645.2	5	0	2	2	2	2	1	1	0	1	1	0	1
4	83	1	56	173	51	17	1	1	3	4	3	2	1	2	1	3	3	3	3	2	1	2	2	2	2	1	2	12.26	12.94	10.5	664.9	11	1	2	2	2	1	2	2	2	2	1	0	2
14	84	2	79	158	76	30.4	3	1	1	1	2	2	1	3	1	2	3	4	4	3	2	1	2	3	2	3	4	14.98	22.63	11.8	483.1	15	1	2	2	2	2	3	3	3	3	1	0	2
31	85	1	48	159	73.5	29.1	2	1	2	2	3	1	2	1	2	4	4	2	3	2	2	2	2	1	2	3	4	19.1	25.22	11.4	457	7	0	2	2	2	2	1	1	2	1	2	0	0
57	86	1	65	159	73.5	29.1	1	1	5	3	4	2	1	2	1	1	1	1	2	1	1	1	1	2	2	1	2	5.93	21.28	12.1	768.8	5	0	2	1	2	2	0	3	0	1	1	0	0
57	87	1	60	165	70	25.7	1	3	5	4	4	2	1	1	2	2	2	4	2	2	1	1	1	2	1	1	1	5.87	10.55	6.8	771.6	8	1	1	1	2	2	1	1	1	2	2	0	1
3	88	1	38	167	87.7	31.4	1	1	3	3	3	1	2	1	2	3	2	4	2	1	2	1	1	1	1	1	3	16.09	20.85	11.4	863.9	5	0	2	2	2	2	0	1	1	1	1	0	1
6	89	1	59	168	89	31.5	1	3	4	2	3	2	1	1	2	3	3	4	4	2	1	2	2	2	1	2	2	10.53	17.62	10.7	517.5	11	1	2	2	2	2	1	2	2	3	2	0	1
4	90	2	51	162	83.4	31.8	1	1	3	3	3	2	1	2	1	1	3	4	3	3	2	1	2	2	1	1	1	15.65	19.41	12.9	783.7	3	0	2	2	2	2	0	0	0	0	0	0	3
5	91	1	70	168	64	22.7	2	3	6	2	2	3	1	3	1	2	2	2	2	3	2	1	2	3	1	2	2	17.26	19.97	13.1	313.8	6	0	2	2	2	1	0	1	1	3	1	0	0
52	92	2	58	150	47	20.9	3	1	4	2	3	2	1	2	1	2	1	4	4	1	1	2	1	2	2	3	2	6.64	6.68	6.5	1838	4	0	1	1	1	1	1	1	0	0	1	0	1
26	93	1	47	170	79.3	27.4	2	1	3	4	4	1	2	1	2	1	2	1	1	2	1	1	1	2	1	2	1	8.22	16.41	6.7	842.4	12	1	1	2	2	2	2	3	3	3	1	0	0
22	94	2	39	155	60	25	3	1	3	4	4	2	1	2	1	4	2	1	2	3	1	1	2	1	1	2	1	8.66	11.12	7	995.7	4	0	2	2	2	2	0	0	0	0	1	0	3
5	95	1	53	170	77.3	26.7	1	1	2	2	2	1	2	1	2	3	4	1	2	1	1	2	1	1	2	2	1	10.2	12.8	7.4	809.6	8	1	2	2	2	2	1	1	2	1	2	0	1
24	96	1	65	175	66.4	21.7	1	1	5	4	4	2	1	1	2	1	1	1	4	3	1	1	1	1	1	1	1	5.54	9.76	8.4	383.5	3	0	2	1	1	1	1	0	1	0	1	0	0
56	97	2	66	155	64.3	26.8	1	1	5	4	4	2	1	2	1	1	1	2	1	3	2	2	2	2	1	3	2	11.27	13.99	12.4	811.8	12	1	2	2	2	2	3	2	1	2	2	0	2
52	98	2	72	132	43	24.7	3	1	1	1	1	2	1	2	1	3	2	3	4	3	1	2	1	3	1	2	1	8.41	8.1	8.7	233.6	14	1	2	2	1	2	3	1	2	3	2	0	3
51	99	1	61	170	72	24.9	2	1	6	3	1	2	1	2	1	1	2	1	1	2	1	2	2	1	2	3	1	4.69	12.12	7.1	271.8	5	0	2	1	2	2	0	2	0	1	2	0	0
4	100	1	46	176	90	29.1	3	1	1	2	2	1	2	2	1	5	2	3	4	2	1	2	1	1	1	4	1	9.03	14.42	7	1422	3	0	2	2	2	2	0	0	0	0	1	0	2
25	101	2	47	155	63	26.2	3	1	1	2	2	2	1	2	1	3	2	2	2	3	1	1	2	2	1	2	1	8.35	21.16	13.5	199	11	1	2	2	2	2	1	3	2	3	1	0	1
50	102	2	55	154	69.7	29.4	3	1	1	1	2	2	1	2	1	1	1	4	4	1	2	1	1	1	2	3	2	6.47	13.23	6.7	2367	10	1	1	1	2	2	0	3	2	3	1	0	1
2	103	2	68	156	61	25.1	1	1	6	2	2	2	1	2	1	2	2	1	2	2	2	1	2	1	1	1	1	7.76	11.17	13.7	257.6	6	0	2	2	2	2	1	2	0	1	1	0	1
2	104	2	69	145	69.7	33.2	3	1	6	1	2	2	1	2	1	2	2	4	4	3	2	2	2	3	1	2	2	4.75	11.74	9.3	381.9	16	1	2	1	2	2	2	3	3	3	2	0	3
6	105	1	56	172	68	23	3	1	1	2	2	2	1	1	2	4	3	4	2	2	1	1	2	1	2	2	1	12.87	25.85	11.6	125.8	7	0	2	2	2	1	1	1	1	1	2	0	1
56	106	2	53	158	71	28.4	3	1	1	1	2	2	1	2	1	4	4	1	4	1	1	2	1	2	1	3	5	5.08	6.8	11	1221	10	1	2	1	1	2	2	1	2	2	2	0	1
3	107	1	47	170	75.9	26.3	2	1	4	2	2	2	1	1	2	4	3	4	4	1	2	1	1	1	1	2	4	16.04	14.33	11.5	666	7	0	2	2	2	2	0	1	3	1	1	0	1
7	108	1	66	170	65	22.5	3	1	5	4	4	2	1	2	1	1	1	1	2	3	1	2	2	2	2	2	2	18.09	20.46	11	20.32	13	1	2	2	2	1	3	3	0	2	2	0	3
2	109	2	53	153	62.5	26.7	2	1	1	1	2	2	1	2	1	5	4	1	4	2	2	2	1	3	2	4	4	8.78	12.14	10	628.9	8	1	2	2	2	2	2	2	1	1	1	0	1
27	110	1	54	173	75	25.1	2	1	3	4	3	1	2	1	2	2	2	3	2	3	1	1	1	2	1	2	2	11.77	16.2	9.2	788.5	3	0	2	2	2	2	0	1	0	1	1	0	0
14	111	1	39	160	65	25.4	2	1	4	2	2	1	2	2	1	4	3	4	4	3	2	2	2	2	2	3	3	14.09	18.34	9.2	1248	14	1	2	2	2	2	2	3	3	3	1	0	2
53	112	2	79	150	54	24	2	3	1	1	2	2	1	2	1	2	3	4	4	3	2	2	2	3	1	3	3	10.82	11.39	10	353.6	12	1	2	2	2	2	2	2	2	3	1	0	2
57	113	1	57	168	57	20.2	1	1	3	4	3	1	2	1	2	2	2	2	2	3	1	2	1	3	1	2	2	18.09	18.45	7.1	1014	17	1	2	2	2	1	3	3	3	3	2	0	3
14	114	1	27	175	72.3	23.6	3	1	1	2	2	1	2	1	2	4	3	1	4	2	1	2	1	1	1	3	4	7.11	9.39	7.2	1151	4	0	2	2	1	1	0	0	1	1	2	0	0
2	115	1	63	165	67.5	24.8	1	1	5	4	4	1	2	1	2	1	1	1	1	1	1	1	1	2	1	2	3	18.84	28.46	11.4	387.6	5	0	2	2	2	2	0	1	0	2	1	0	1
22	116	2	72	155	55.5	23.1	1	1	5	2	4	2	1	2	1	2	2	4	3	3	1	1	2	3	1	2	1	8.16	10.53	8	695.3	11	1	2	2	2	1	1	3	2	3	1	0	1
56	117	2	55	160	56.5	22.1	1	1	3	3	3	2	1	2	1	2	1	1	2	3	2	2	2	2	1	2	2	8.33	9.52	6.7	418.9	12	1	1	2	1	1	2	3	2	2	1	0	2
25	118	1	47	170	70.2	24.3	3	1	1	2	2	1	2	1	2	4	3	1	4	2	2	2	2	2	1	3	2	14.51	16.7	14	822.7	10	1	2	2	2	2	1	3	1	2	1	0	2
2	119	1	54	172	64.2	21.7	1	1	3	4	4	1	2	2	1	2	2	3	1	3	1	1	1	1	1	2	1	18.18	21.44	12	1683	10	1	2	2	2	1	1	2	2	3	1	0	1
51	120	1	51	171	88	30.1	1	1	3	4	4	1	2	2	1	2	1	2	2	2	1	2	1	1	2	2	1	19.17	22.3	13.6	366	3	0	2	2	2	2	0	1	0	1	1	0	0
51	121	1	51	168	63	22.3	3	1	1	2	2	1	2	2	1	4	3	4	4	1	1	2	1	2	1	3	5	12.55	21.79	11.5	609	14	1	2	2	2	1	3	3	2	1	2	0	3
3	122	1	59	170	77	26.6	2	1	3	3	3	1	2	1	2	2	2	2	2	3	1	2	1	1	1	1	1	7.76	8.92	6.9	742.1	12	1	1	2	1	2	1	3	2	3	2	0	1
27	123	1	62	176	70	22.6	1	1	5	4	4	1	2	1	2	2	1	1	2	3	2	2	1	3	1	1	2	8.42	8.22	9.8	446.4	15	1	2	2	1	1	3	3	1	3	2	0	3
52	124	2	51	160	64	25	3	1	1	1	2	2	1	2	1	4	3	4	3	1	1	2	2	2	1	3	5	15.85	15.06	13.5	1016	14	1	2	2	2	2	2	3	2	3	1	0	3
5	125	1	59	170	63	21.8	1	1	3	3	4	1	2	1	2	1	1	1	2	3	1	1	2	2	1	1	2	9.05	16.49	9.4	1062	10	1	2	2	2	1	1	2	2	3	1	0	1
6	126	1	57	177	61.8	19.7	2	1	1	2	2	1	2	2	1	3	3	2	3	3	2	2	2	2	1	3	3	9.47	17.7	12.1	713.9	5	0	2	2	2	1	0	2	1	0	2	0	0
10	127	2	70	165	55	20.2	2	1	5	3	4	2	1	2	1	1	2	4	2	3	2	2	1	3	1	1	2	7.41	9.09	7.6	923	14	1	2	2	1	1	3	3	2	3	2	0	1
4	128	1	67	170	55.6	19.2	1	1	6	4	4	1	2	3	1	2	3	4	2	3	2	1	1	3	1	1	5	11.21	12.61	21.2	471.9	13	1	2	2	2	1	1	3	2	3	2	0	2
13	129	1	58	163	71	26.7	3	1	1	3	2	3	1	1	2	4	4	1	4	3	1	2	1	1	1	3	3	7.5	9.64	8.9	870.1	4	0	2	2	1	2	0	1	1	1	1	0	0
56	130	1	75	162	44	16.8	2	1	6	2	1	1	2	2	1	2	1	3	4	3	1	2	2	3	1	2	2	9.65	10.71	10.2	417.9	12	1	2	2	2	1	2	2	1	2	1	1	3
57	131	2	56	152	67.5	29.2	3	1	1	1	2	2	1	2	1	4	3	3	4	1	2	2	2	2	1	3	4	10.75	12.91	13.8	533.3	13	1	2	2	2	2	2	3	2	2	2	0	2
50	132	1	58	165	55	20.2	1	1	4	4	1	1	2	1	2	2	2	3	2	2	2	2	2	2	1	1	2	9.38	8.9	6.6	1195	14	1	1	2	1	1	2	2	2	3	2	0	3
25	133	2	49	165	77	28.3	3	1	1	2	1	2	1	2	1	5	2	2	2	3	1	2	2	2	1	3	2	11.82	22.45	8.5	1259	2	0	2	2	2	2	1	0	0	0	1	0	0
26	134	2	58	168	91	32.2	1	1	5	3	0.3	2	1	2	1	2	2	3	3	3	2	1	1	1	1	2	2	12.97	10.34	6.4	1400	4	0	1	2	2	2	1	2	0	0	1	0	0
57	135	2	25	158	54	21.6	3	1	4	4	2	2	1	1	2	3	3	3	4	1	1	1	2	1	1	3	2	10.81	9.29	13.4	201.9	6	0	2	2	1	1	1	1	1	0	1	0	2
27	136	2	52	155	54	22.5	3	1	1	1	2	2	1	2	1	2	2	2	3	3	1	1	2	1	1	2	1	12.36	14.2	10.5	495.3	4	0	2	2	2	1	1	1	0	0	1	0	1
23	137	1	42	167	64.5	23.1	2	1	2	2	3	1	2	1	2	2	2	2	3	3	1	1	1	1	1	2	2	10.41	19.37	10.1	205.1	8	1	2	2	2	1	2	2	1	0	2	0	1
2	138	1	37	173	68	22.7	1	3	4	2	2	1	2	3	1	3	2	3	2	1	1	1	1	1	1	3	2	8.76	20.23	9.4	266.7	5	0	2	2	2	1	1	1	1	0	1	0	1
52	139	2	60	156	51.9	21.3	2	1	1	1	3	2	1	2	1	1	2	3	2	3	2	1	2	1	1	1	1	4.54	13.8	8.4	353.5	6	0	2	1	2	1	2	1	0	0	2	0	1
6	140	1	54	155	40	16.6	1	1	6	3	3	1	2	2	1	1	1	4	3	3	1	1	2	1	1	2	2	18.55	30.4	12.2	339	7	0	2	2	2	1	2	2	0	0	1	0	2
2	141	1	19	178	76.6	24.2	1	2	6	4	3	1	2	1	2	2	2	2	4	1	1	1	1	1	1	2	1	16.94	13.58	11.2	1782	6	0	2	2	2	2	1	1	1	0	1	0	2
15	142	2	58	152	61	26.4	3	1	6	1	2	2	1	2	1	2	2	2	2	3	1	1	2	1	1	2	1	7.34	9	7.8	465.1	5	0	2	2	1	2	2	1	0	0	1	0	1
57	143	1	32	183	108.7	32.5	1	1	3	4	4	1	2	1	2	3	3	4	2	3	1	1	2	1	1	2	1	8.65	8.79	6.4	2669	10	1	1	2	1	2	1	3	2	0	2	0	2
57	144	2	80	150	46	20.4	2	1	5	3	4	2	1	2	1	4	1	4	4	3	2	1	2	1	1	2	3	9.28	10.34	8	534.3	17	1	2	2	2	1	3	2	1	3	2	3	3
26	145	1	58	164	67	24.9	1	1	3	4	4	2	1	2	1	2	2	2	2	3	1	2	2	2	1	2	2	7.03	8.59	9.1	775.4	4	0	2	2	1	2	0	1	1	0	1	0	1
2	146	1	63	158	60	24	3	1	1	2	2	1	2	1	2	2	2	4	4	2	2	2	2	2	1	3	2	17.26	12.04	13	1130	8	1	2	2	2	2	1	1	1	2	1	0	2
56	147	1	44	180	76.7	23.7	1	1	3	3	3	2	1	2	1	2	1	4	1	2	1	1	2	2	1	1	1	6.36	7.99	6.5	1097	6	0	1	1	1	1	1	0	1	0	1	0	3
50	148	1	58	172	74	25	1	1	5	3	3	1	2	1	2	3	1	4	1	3	2	1	2	1	1	1	1	6.19	10.56	7.4	384.5	3	0	2	1	2	2	1	0	0	0	1	0	1
64	149	2	43	158	66	26.4	3	3	1	1	2	2	1	2	1	3	2	2	3	3	1	2	1	2	1	3	2	8.25	15.33	7.8	972.2	9	1	2	2	2	2	1	2	1	2	1	0	2
5	150	2	60	155	62	25.8	3	3	1	2	2	2	1	2	1	2	2	2	4	3	2	1	1	1	1	2	2	13.66	13.7	7.6	1383	5	0	2	2	2	2	1	0	0	2	2	0	2
5	151	1	54	170	65	22.5	3	1	4	2	3	1	2	2	1	2	3	3	4	3	1	2	1	2	1	2	2	14.23	18.37	12.5	626.3	7	0	2	2	2	1	1	1	1	0	1	0	1
5	152	1	62	172	64	21.6	2	1	4	3	3	1	2	3	1	3	3	2	2	3	2	2	2	2	1	2	3	32.13	10.4	14.1	45.5	5	0	2	2	2	1	1	0	0	0	1	0	3
9	153	1	54	177	65	20.7	3	1	1	1	2	2	1	2	1	3	3	2	2	2	1	1	1	1	1	2	1	16.69	32.74	11	1438	7	0	2	2	2	1	2	2	0	0	2	0	1
15	154	1	85	174	62	20.5	2	1	5	3	4	2	1	2	1	1	2	3	2	3	1	1	1	2	1	2	1	8.07	12.28	9.7	689.8	3	0	2	2	2	1	1	1	0	0	1	0	0
26	155	1	64	172	67	22.6	1	1	5	1	3	2	1	1	2	1	1	2	3	3	1	1	1	1	1	1	1	5.52	8.6	6.3	1069	3	0	1	1	1	1	0	0	1	0	0	0	2
27	156	2	61	153	54	23.1	1	1	5	1	2	2	1	2	1	1	1	1	2	3	1	1	2	1	1	2	1	7.17	9.2	7.4	837.5	4	0	2	2	1	1	1	1	1	0	1	0	0
56	157	2	58	152	63	27.3	3	1	1	1	2	2	1	2	1	1	1	1	2	3	2	2	1	1	1	1	1	6.28	10.27	9.7	1046	6	0	2	1	2	2	2	0	0	1	1	0	2
17	158	1	57	176	65	21	1	1	6	1	2	2	1	1	2	1	1	2	2	3	2	1	2	1	1	1	1	8.83	12.22	9.5	1143	8	1	2	2	2	1	1	1	0	0	2	1	3
53	159	1	35	169	70	24.5	1	1	3	4	3	2	1	1	2	4	2	3	2	3	2	1	1	2	2	1	1	9.97	9.65	5.8	965.2	8	1	1	2	1	2	1	1	2	0	1	0	3
10	160	1	52	168	72	25.5	1	1	2	2	3	2	1	2	1	1	1	4	2	2	2	1	1	2	1	1	1	6.51	12.85	7.1	460.1	4	0	2	1	2	2	1	1	0	0	1	0	1
4	161	1	50	168	68	24.1	3	1	6	4	4	2	1	2	1	2	2	2	2	2	1	1	1	1	1	2	2	6.9	6.2	6.8	382	8	1	1	1	1	2	2	1	0	1	1	0	3
7	162	2	48	156	64	26.3	1	1	3	4	4	2	1	2	1	3	2	2	1	3	2	2	1	1	1	1	2	7.42	12.29	7.6	476	5	0	2	2	2	2	1	1	1	0	1	0	1
8	163	2	49	170	70	24.2	1	1	4	2	3	1	2	1	2	3	3	4	2	2	2	2	2	1	1	3	2	8.2	7.91	11.2	1062	6	0	2	2	1	2	1	0	2	0	1	0	2
56	164	1	65	172	64	21.6	1	1	5	3	2	1	2	3	1	3	3	3	3	3	1	2	2	2	1	2	3	11.21	10.26	11.2	782.1	14	1	2	2	2	1	3	2	1	2	2	1	3
52	165	2	64	156	62	25.5	2	3	4	2	2	2	1	2	1	4	2	4	4	3	2	2	2	2	2	4	5	7.2	6.92	7.8	926.1	10	1	2	2	1	2	2	3	0	1	1	2	1
14	166	1	48	172	68	23	2	1	2	2	2	3	1	1	2	3	2	1	4	2	1	2	1	1	1	4	4	6.92	11.24	11.3	1092.2	5	0	2	1	2	1	1	1	1	0	1	0	1
15	167	1	49	167	65	23.3	3	1	1	1	2	1	2	1	2	5	3	4	4	3	1	2	2	2	2	3	4	9.82	9.21	9.4	482	8	1	2	2	1	1	3	1	0	1	2	0	1
3	168	2	45	160	65	25.4	1	1	4	2	3	1	2	1	2	3	3	4	4	3	1	2	2	1	1	2	2	9.28	12.52	12.4	982.4	8	1	2	2	2	2	1	0	1	1	2	1	2
4	169	2	70	164	63	23.4	1	3	5	3	4	2	1	2	1	2	1	3	1	3	2	2	2	2	1	1	4	9.91	10.92	13.3	48.5	12	1	2	2	2	1	2	3	2	3	2	1	0
56	170	1	47	171	64	21.9	2	3	2	2	2	1	2	1	2	3	3	3	4	3	1	2	2	2	1	3	4	11.22	9.42	7.9	762	8	1	2	2	1	1	1	3	0	1	2	0	1
26	171	1	45	173	61	20.4	1	1	4	2	3	1	2	1	2	4	3	4	4	1	1	2	1	2	2	2	3	12.3	11.29	12.4	826.1	11	1	2	2	2	1	2	1	1	2	2	0	3
55	172	1	61	178	81	25.6	1	3	5	3	3	1	2	1	2	3	3	4	2	3	2	1	2	2	1	2	2	7.3	7.24	7.1	542.4	9	1	2	2	1	2	1	2	0	2	2	0	2
25	173	1	32	175	82	26.8	2	2	2	2	3	1	2	1	2	4	3	4	4	1	2	1	1	1	1	2	4	6.9	7.32	6.9	641	6	0	1	1	1	2	0	1	2	1	2	0	0
54	174	2	64	153	62	26.5	3	1	1	1	2	2	1	2	1	4	2	4	3	3	2	2	1	2	1	2	2	8.49	6.21	6.4	78.2	13	1	1	2	1	2	2	2	2	3	2	0	2
14	175	1	45	178	85	26.8	3	1	1	1	1	1	2	1	2	5	4	4	4	3	1	2	2	2	2	4	5	14.2	20.25	13	692	12	1	2	2	2	2	2	1	2	2	2	0	3
52	176	2	56	156	64	26.3	2	1	1	1	3	2	1	2	1	3	2	4	4	3	1	2	2	1	2	2	3	6.32	16.3	14.4	781	6	0	2	1	2	2	1	0	0	1	2	0	2
26	177	1	72	171	61	20.9	1	3	5	3	4	1	2	1	2	2	1	4	2	3	2	1	2	2	1	2	2	9.82	9.42	8.6	496.4	10	1	2	2	1	1	0	3	2	2	2	0	1
24	178	2	50	158	54	21.6	3	1	1	2	2	2	1	2	1	5	3	1	2	3	1	2	1	2	1	3	4	6.21	7.4	6.1	1096	5	0	1	1	1	1	0	1	1	1	1	0	1
2	179	1	54	172	64	21.6	1	1	3	4	4	1	2	2	1	1	1	1	2	3	1	1	2	2	1	3	2	7.28	9.6	8.4	1016	7	0	2	2	1	1	0	2	0	2	1	0	2
10	180	2	74	165	71	26.1	2	1	1	1	2	2	1	2	1	1	2	1	3	3	2	1	2	2	1	2	2	10.26	10.82	9.2	1286	16	1	2	2	2	2	3	3	2	3	2	0	3
7	181	1	38	176	68	22	1	1	2	3	2	2	1	1	2	5	2	3	2	1	1	1	1	1	1	2	2	6.82	7.1	6.9	782.2	3	0	1	1	1	1	0	1	0	0	1	0	1
13	182	2	41	158	54	21.6	2	1	3	4	4	2	1	2	1	2	3	4	2	2	1	1	2	1	1	2	1	6.42	6.9	6.3	1281	2	0	1	1	1	1	0	0	0	0	1	0	1
14	183	1	49	167	62	22.2	3	3	2	1	1	1	2	1	2	5	4	4	4	2	1	2	1	1	2	4	2	12.9	12.26	11.3	792.1	10	1	2	2	2	1	1	2	2	1	2	0	2
24	184	1	60	169	69	24.2	1	1	5	3	3	1	2	1	2	2	1	1	2	3	2	1	2	2	1	3	3	10.21	12.21	12.2	1026	8	1	2	2	2	2	0	3	1	2	1	0	1
59	185	1	62	168	60	21.3	1	1	6	2	3	1	2	3	1	3	3	3	3	1	2	2	2	2	1	2	4	5.21	8.6	7.2	1244	5	0	2	1	1	1	1	1	0	1	1	0	1
26	186	2	32	161	65	25.1	1	2	4	2	2	2	1	2	1	5	3	4	4	1	1	1	1	1	1	2	5	7.36	12.12	11.4	982.5	6	0	2	2	2	2	0	2	0	1	1	0	2
27	187	1	42	171	68	23.3	1	1	2	2	2	1	2	3	1	3	2	2	2	2	1	2	1	1	2	2	3	9.29	9.61	9.8	2422	9	1	2	2	1	1	2	3	1	0	1	0	2
56	188	1	39	175	72	23.5	2	2	4	2	3	1	2	1	2	5	3	3	4	2	2	1	2	2	2	3	3	12.8	11.24	8.6	256.1	8	1	2	2	2	1	1	0	2	2	1	0	2
10	189	2	56	154	62	26.1	3	1	1	1	3	2	1	2	1	2	1	1	2	3	1	2	2	1	1	2	2	5.82	6.9	6.2	1982	6	0	1	1	1	2	2	0	0	1	1	0	2
8	190	2	49	158	64	25.6	1	1	6	2	2	2	1	1	2	4	4	4	4	1	1	2	2	2	1	3	5	6.26	9.82	7.1	2256	7	0	2	1	1	2	1	1	1	0	1	0	3
14	191	1	72	178	74	23.4	1	1	5	4	4	1	2	1	2	1	1	4	2	3	2	2	2	3	1	1	2	15.28	19.82	9.1	455	15	1	2	2	2	1	2	3	2	3	2	0	3
27	192	1	35	175	80	26.1	1	1	4	2	3	1	2	1	2	4	3	4	3	1	1	1	2	1	2	2	1	6.82	6.26	6.2	489	4	0	1	1	1	2	0	1	0	1	2	0	0
22	193	2	38	158	54	21.6	2	1	1	2	2	2	1	2	1	4	2	4	4	2	1	2	2	2	1	3	2	9.89	11.26	9.8	794.5	8	1	2	2	2	1	1	3	0	1	1	0	2
